# Supplementary material for: Recent climate change strengthens the local cooling of European forests
Source: Research Square preprint supplement (doi:10.21203/rs.3.rs-5281378/v1), 2025-02-20
Supplement: Supplementary file 1 [file b95b43be5d047f5d831898f2.docx]

Supplementary Information of

**Recent climate change strengthens the local cooling·of European forests**


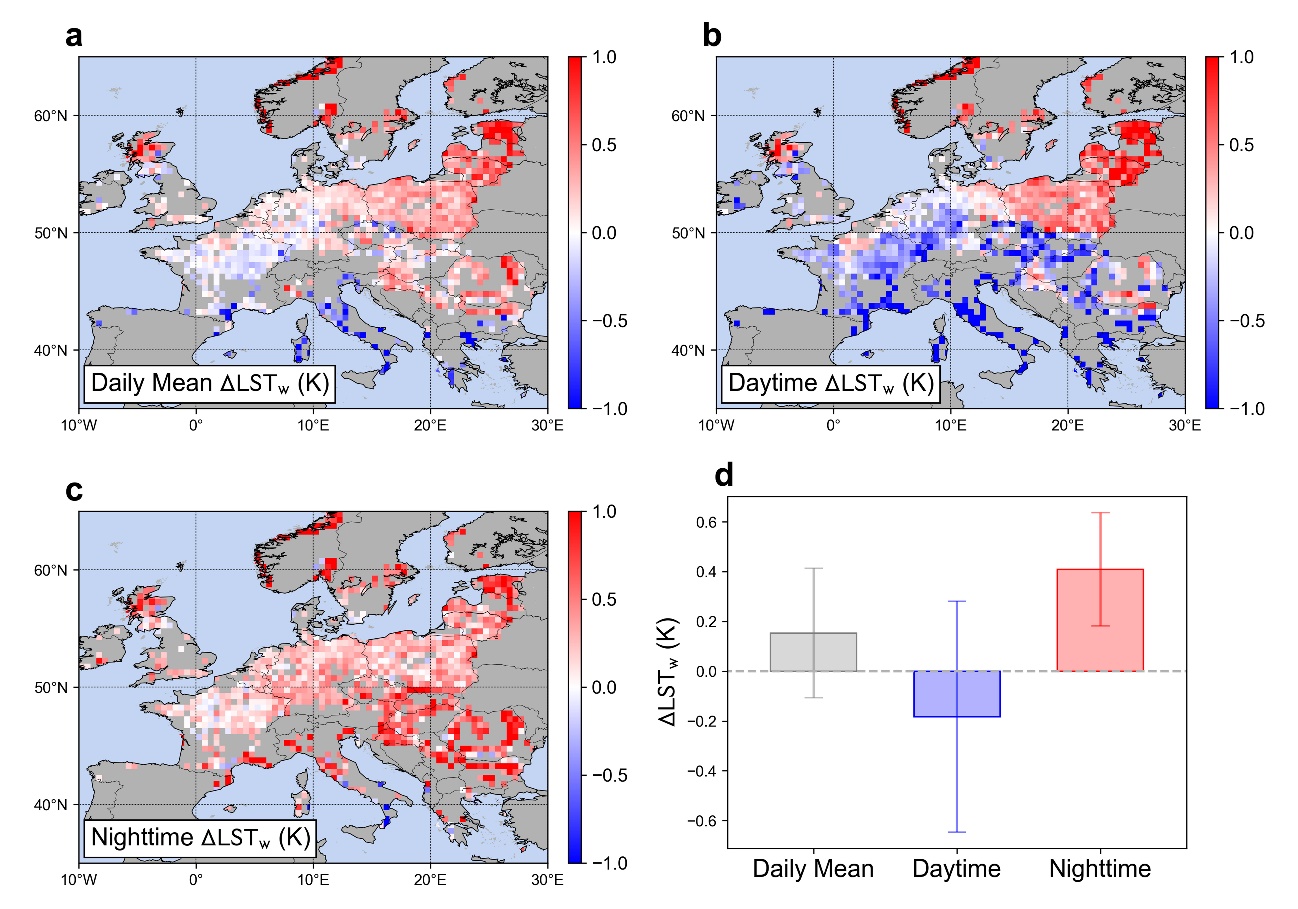


**Fig. S1.** Mean biophysical land surface temperature effect of European forest in winter from 2003 to 2023 (ΔLSTw). (a to c) Spatial pattern of daily mean, daytime, and nighttime ΔLSTw. (d) Regional mean ΔLSTw. Error bars show the half of standard deviation.


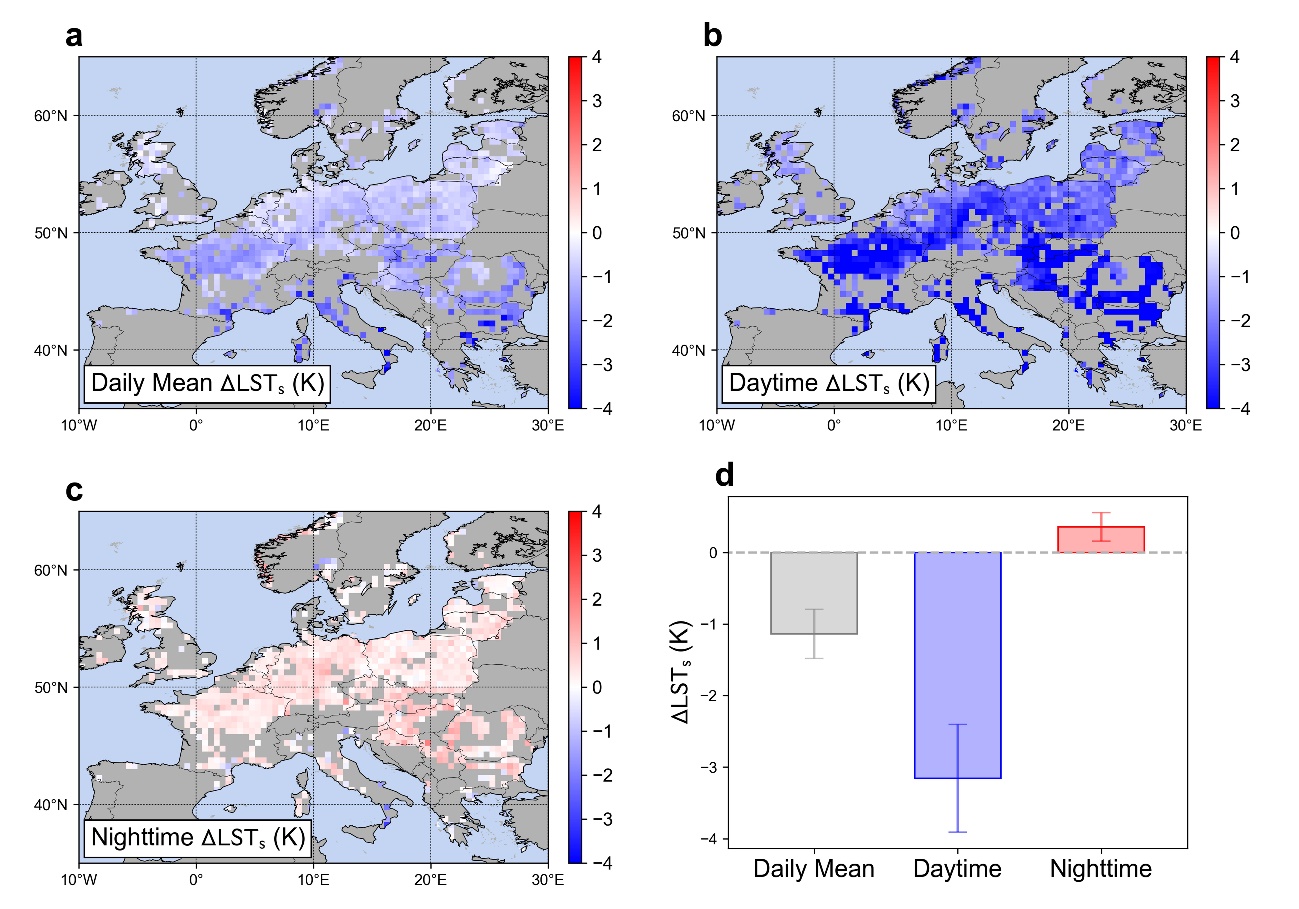


**Fig. S2.** Mean biophysical land surface temperature effect of European forest in summer from 2003 to 2023 (ΔLSTs). (a to c) Spatial pattern of daily mean, daytime, and nighttime ΔLSTs. (d) Regional mean ΔLSTs. Error bars show the half of standard deviation.


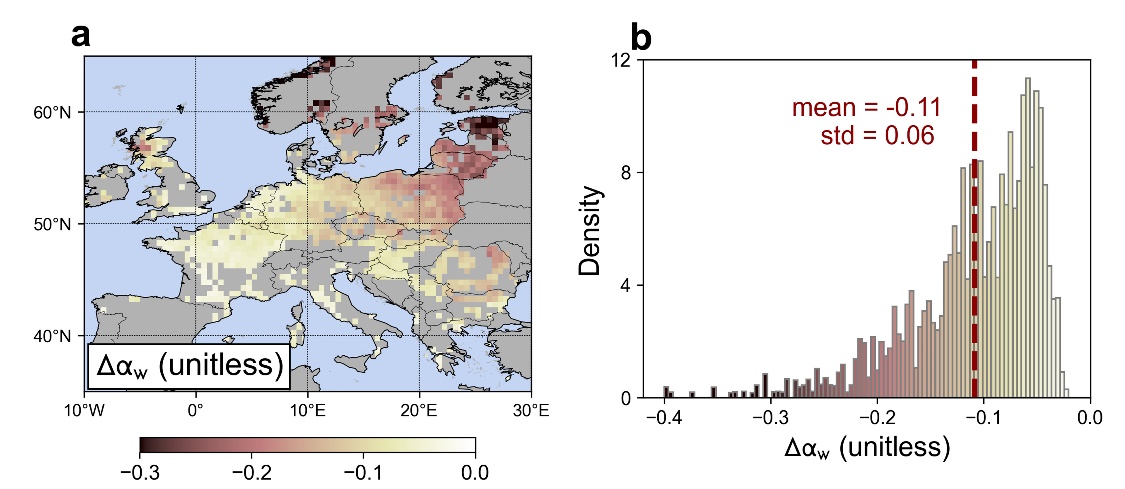


**Fig. S3.** Mean albedo effect of European forest in winter from 2003 to 2023 (Δαw). (a) Spatial pattern of Δαw. (b) Density histogram of Δαw.


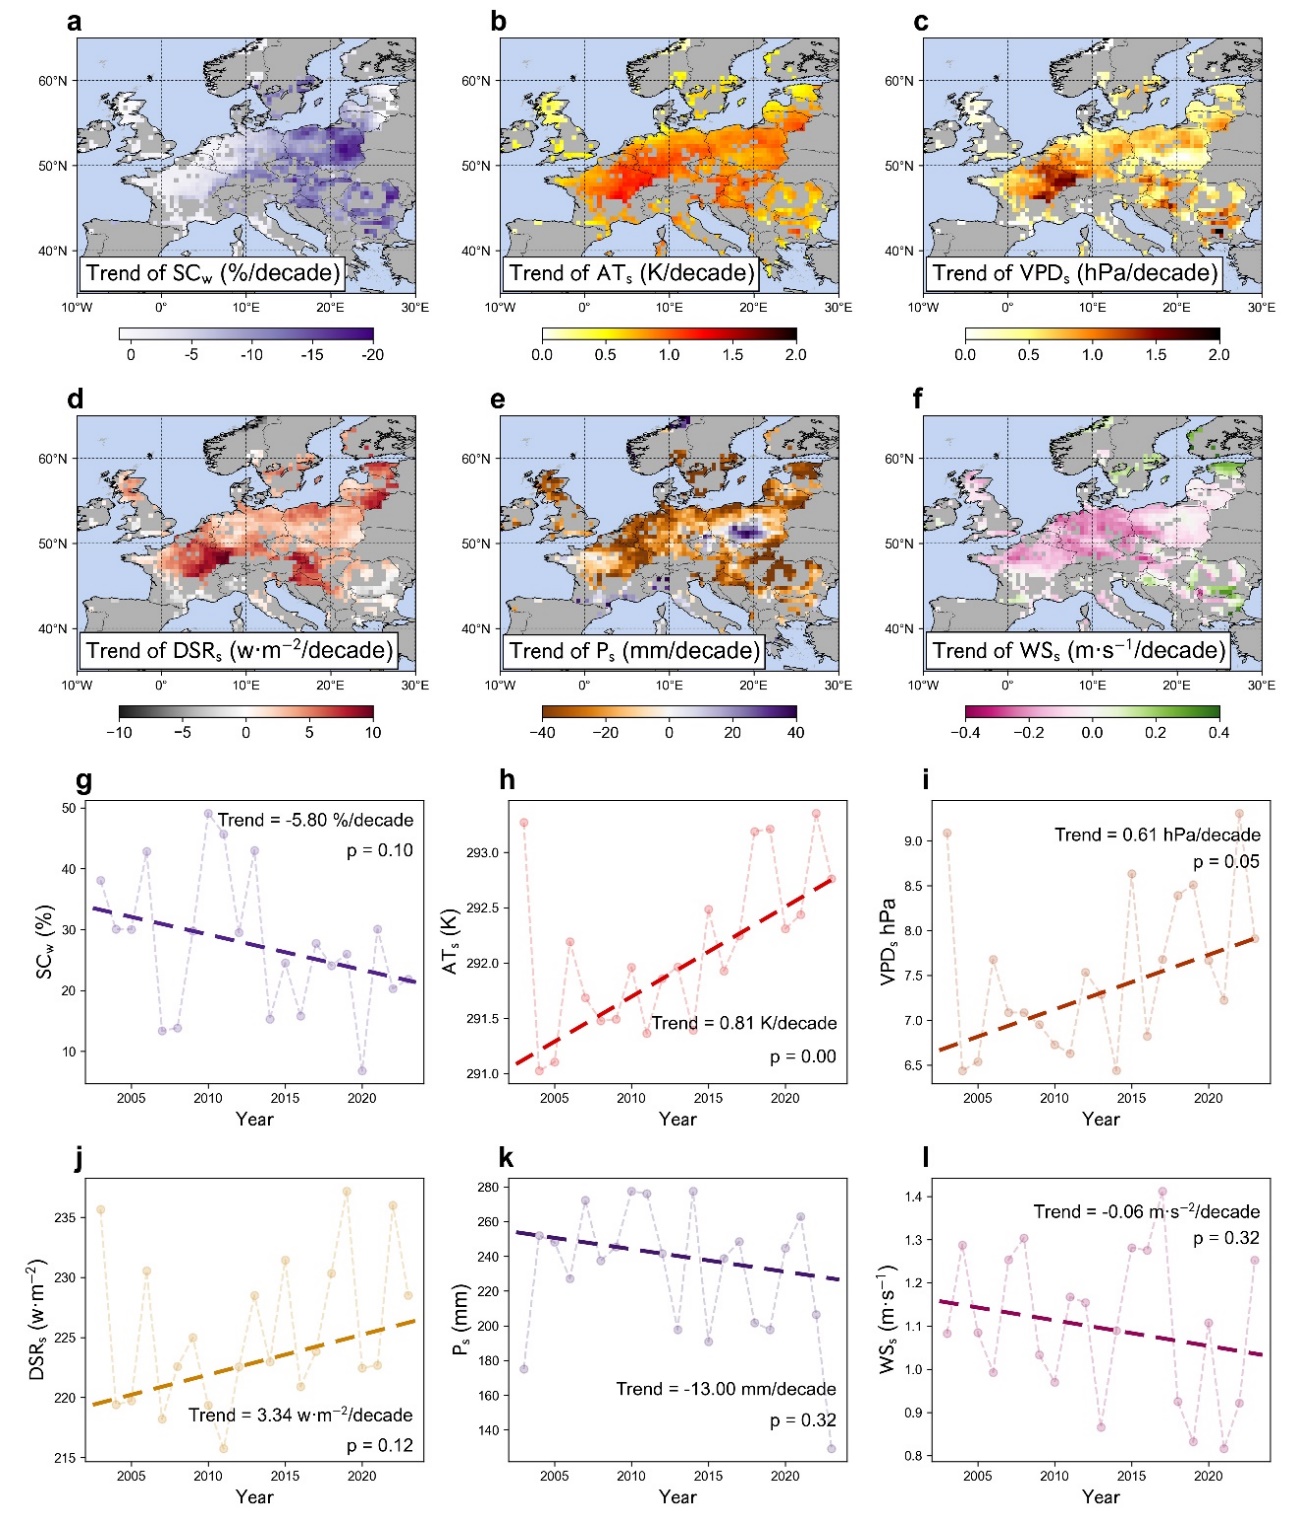
**Fig. S4.** Climate change in Europe from 2003 to 2023. (a to f) Spatial pattern of trends of snow cover (SCw), summer air temperature (ATs), vapor pressure deficit (VPDs), downward shortwave radiation (DSRs), precipitation (Ps) and wind speed (WSs). (g to l) Regional mean interannual variations and trends of the climate variables. The subscripts s and w represent summer and winter, respectively.


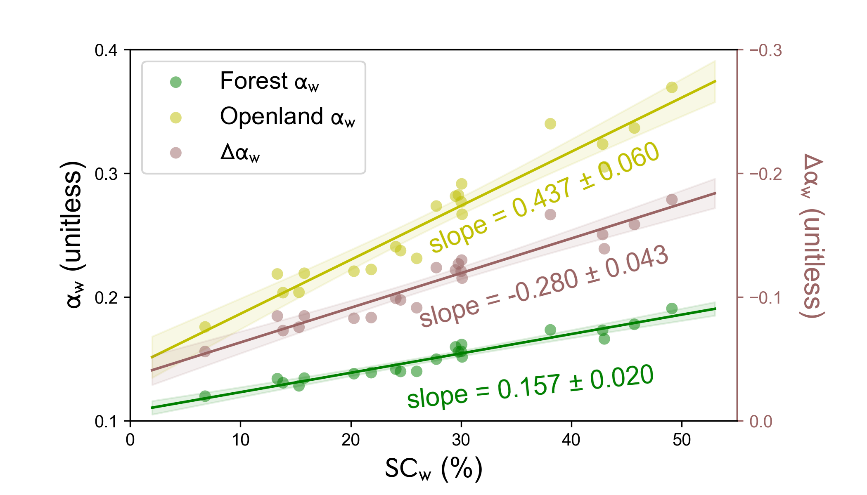


**Fig. S5.** Temporal relationships between the regional mean SCw and αw in forests and openlands, and the resultant relationship between SCw and Δαw.


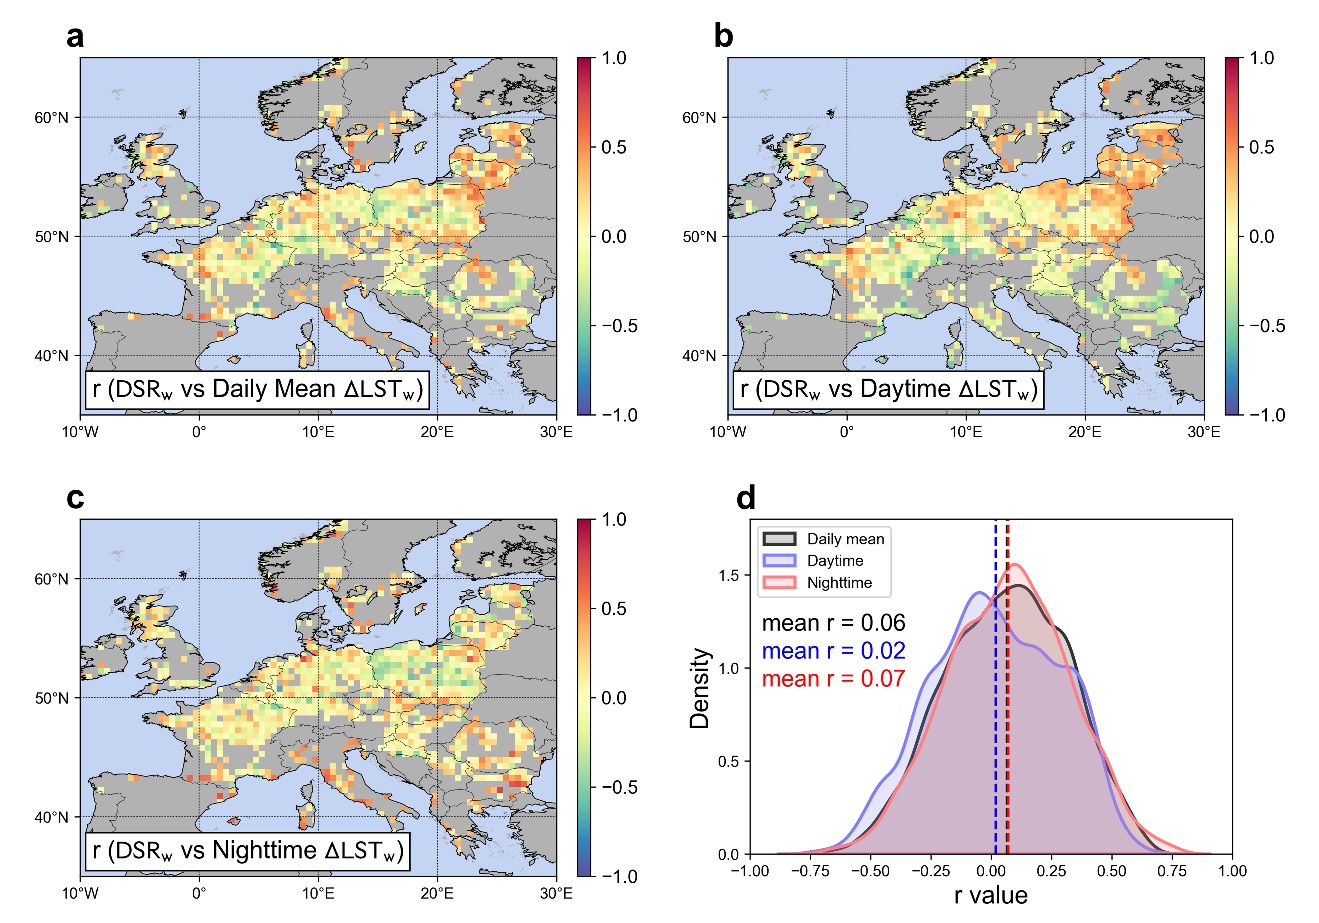


**Fig. S6.** Temporal correlation coefficient (r) between DSRw and ΔLSTw. (a to c) Spatial pattern of r between DSRw and daily mean, daytime and nighttime ΔLSTw. (d) Density of the r values.


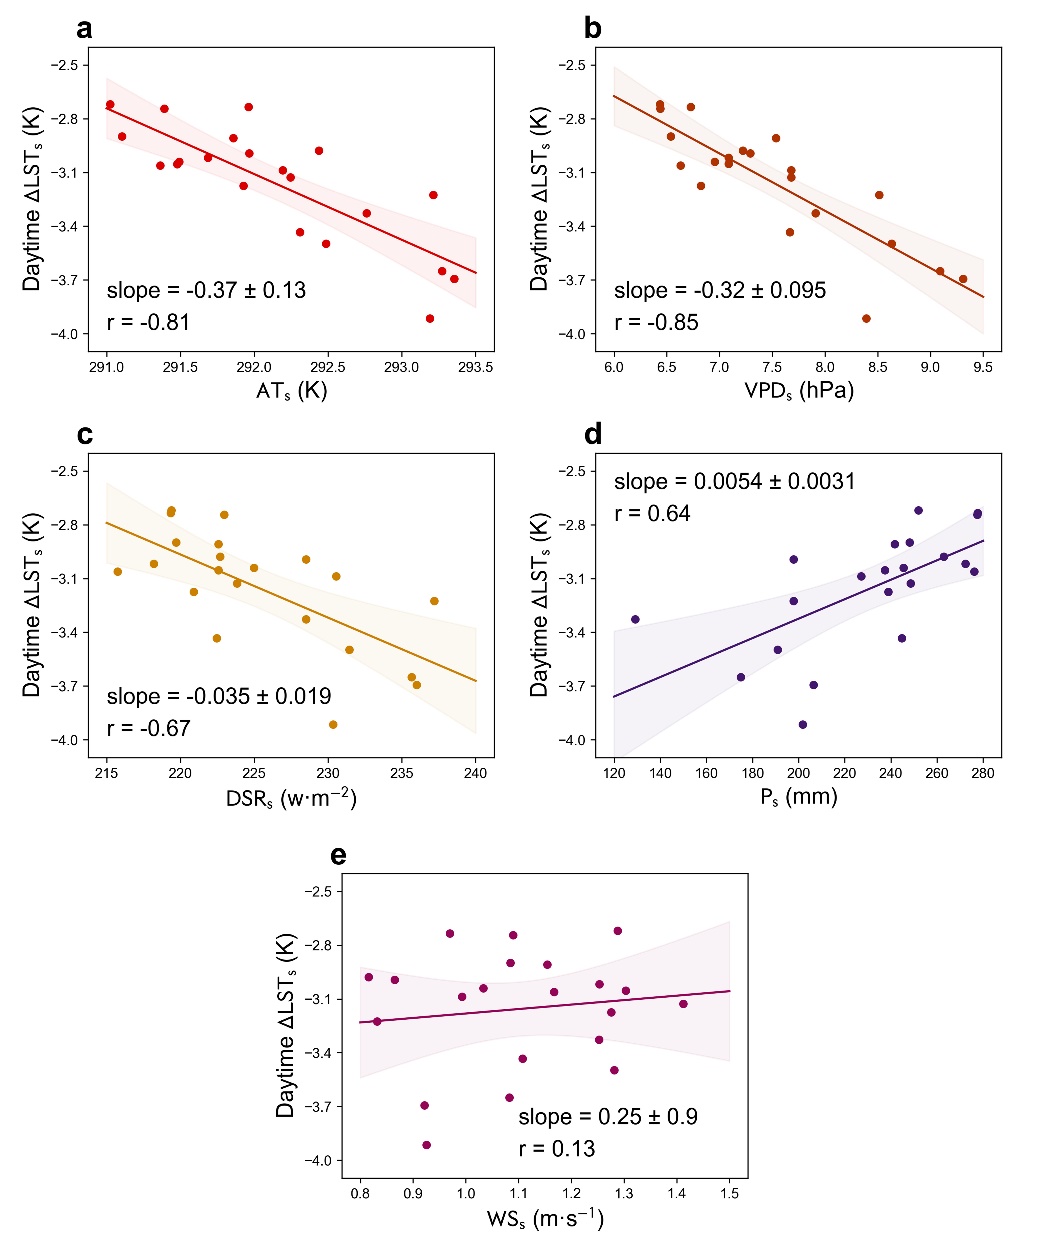


**Fig. S7.** Regressions between regional mean daytime ΔLSTs and (a) air temperature (ATs), (b) vapor pressure deficit (VPDs), (c) downward shortwave radiation (DSRs), (d) precipitation (Ps) and (e) wind speed (WSs) in summer.


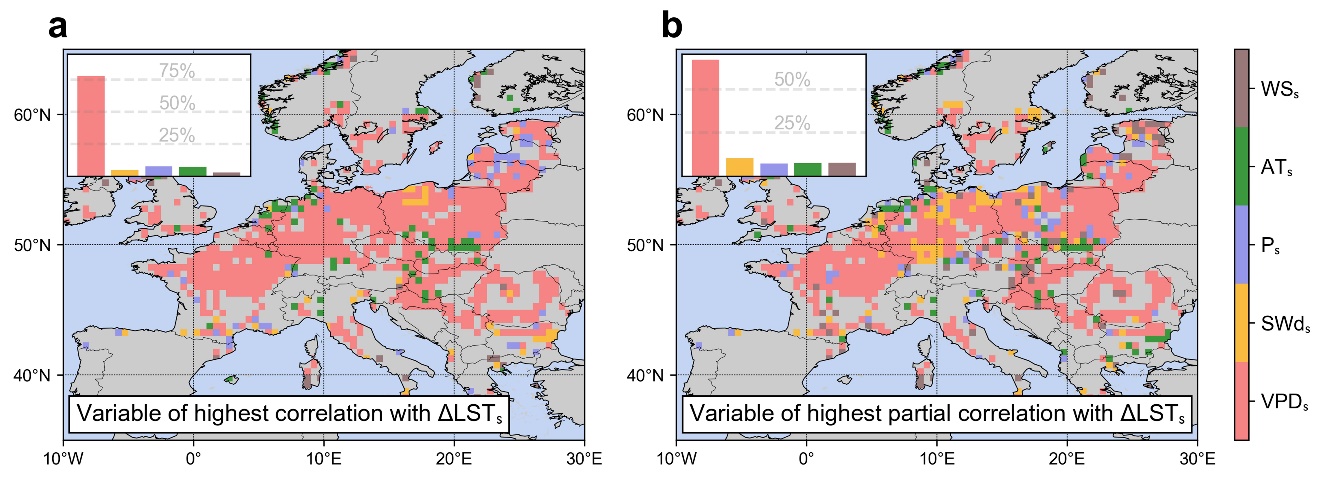


**Fig. S8.** Climatic drivers of daytime ΔLSTs determined by largest absolute (a) correlation coefficient and (b) partial correlation coefficient.


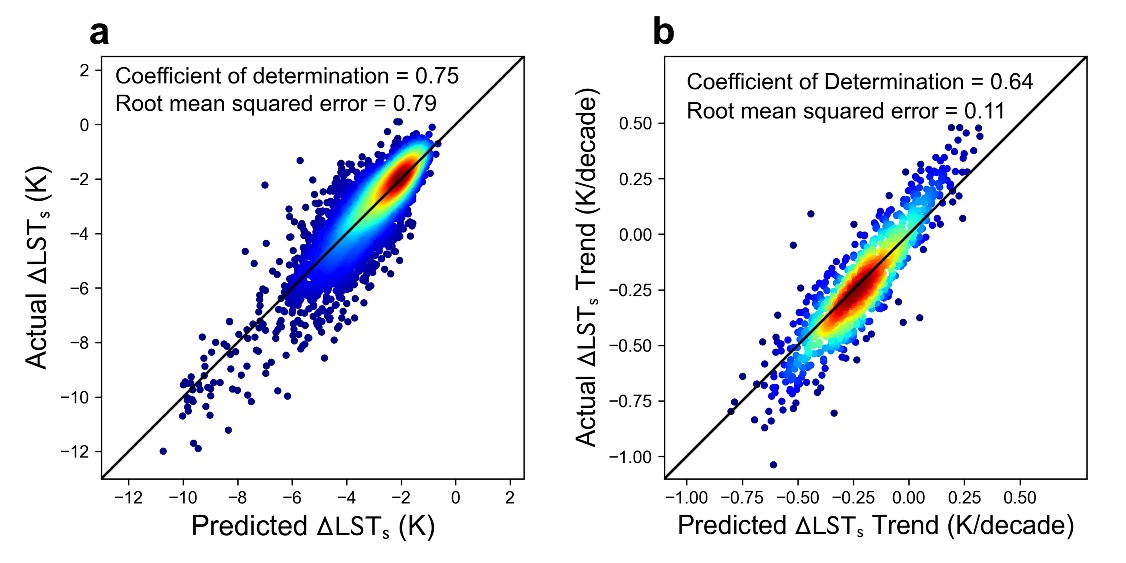


**Fig. S9.** Validation of the random forest model for estimating the daytime ΔLSTs. (a) Scatter plot between predicted ΔLSTs and observed ΔLSTs. (b) Similar with a, but for the trends of ΔLSTs.


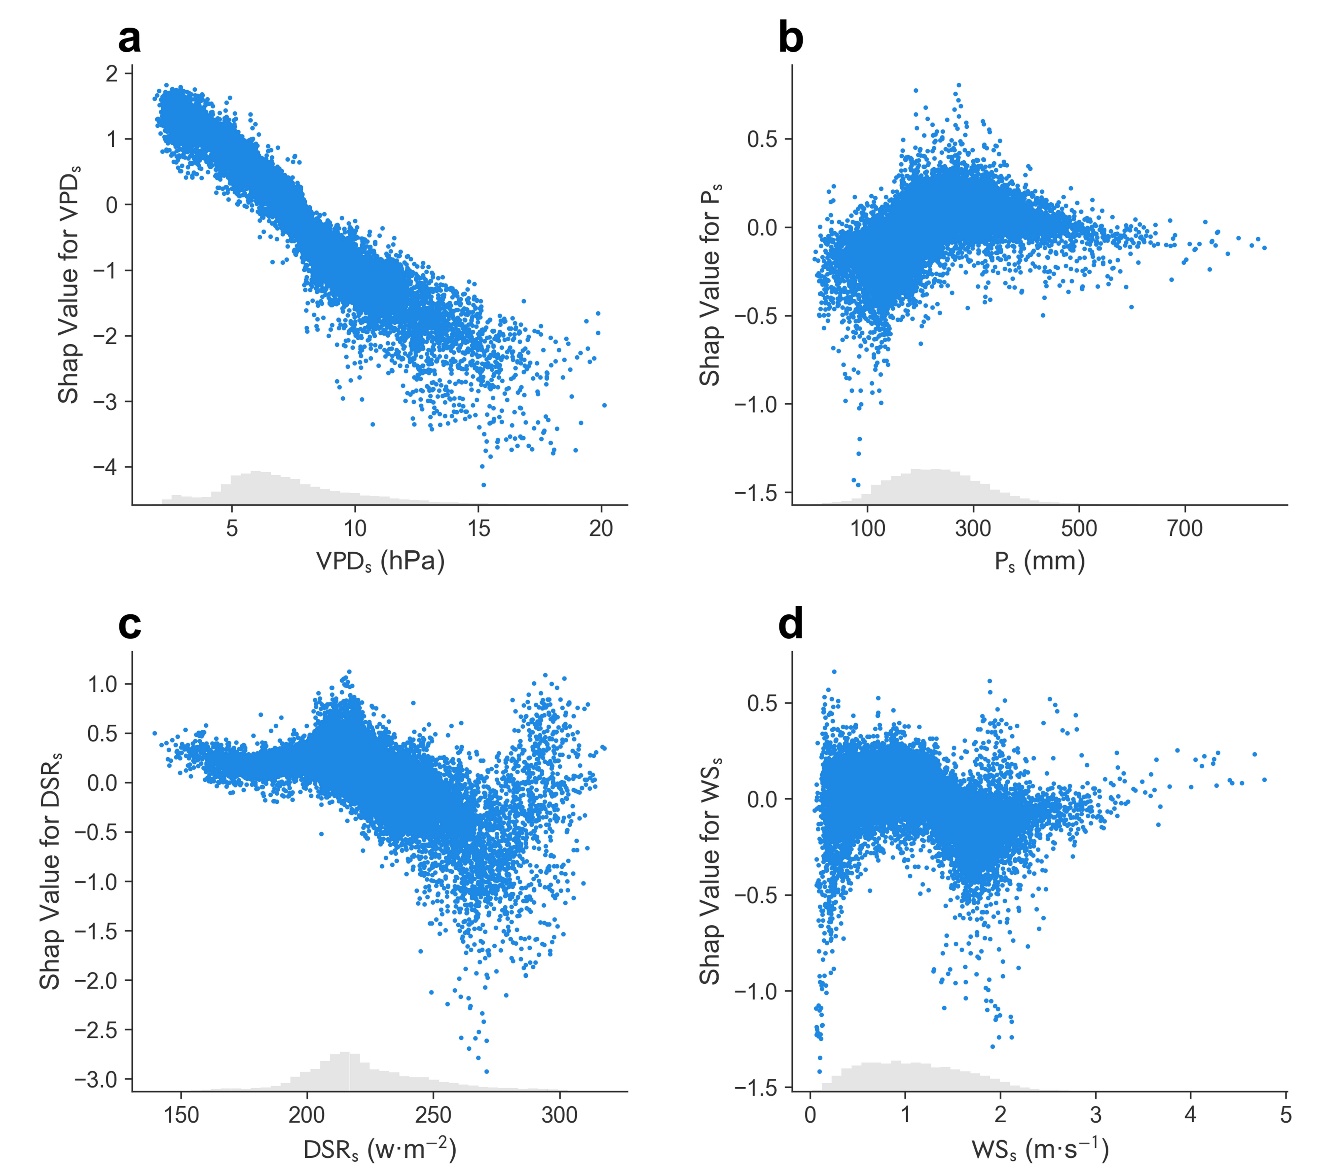


**Fig. S10.** Scatter plots between input data and corresponding Shapley Additive Explanations (SHAP) values for summer (a) vapor pressure deficit (VPDs), (b) precipitation (Ps), (c) downward shortwave radiation (DSRs), (d) wind speed (WSs).


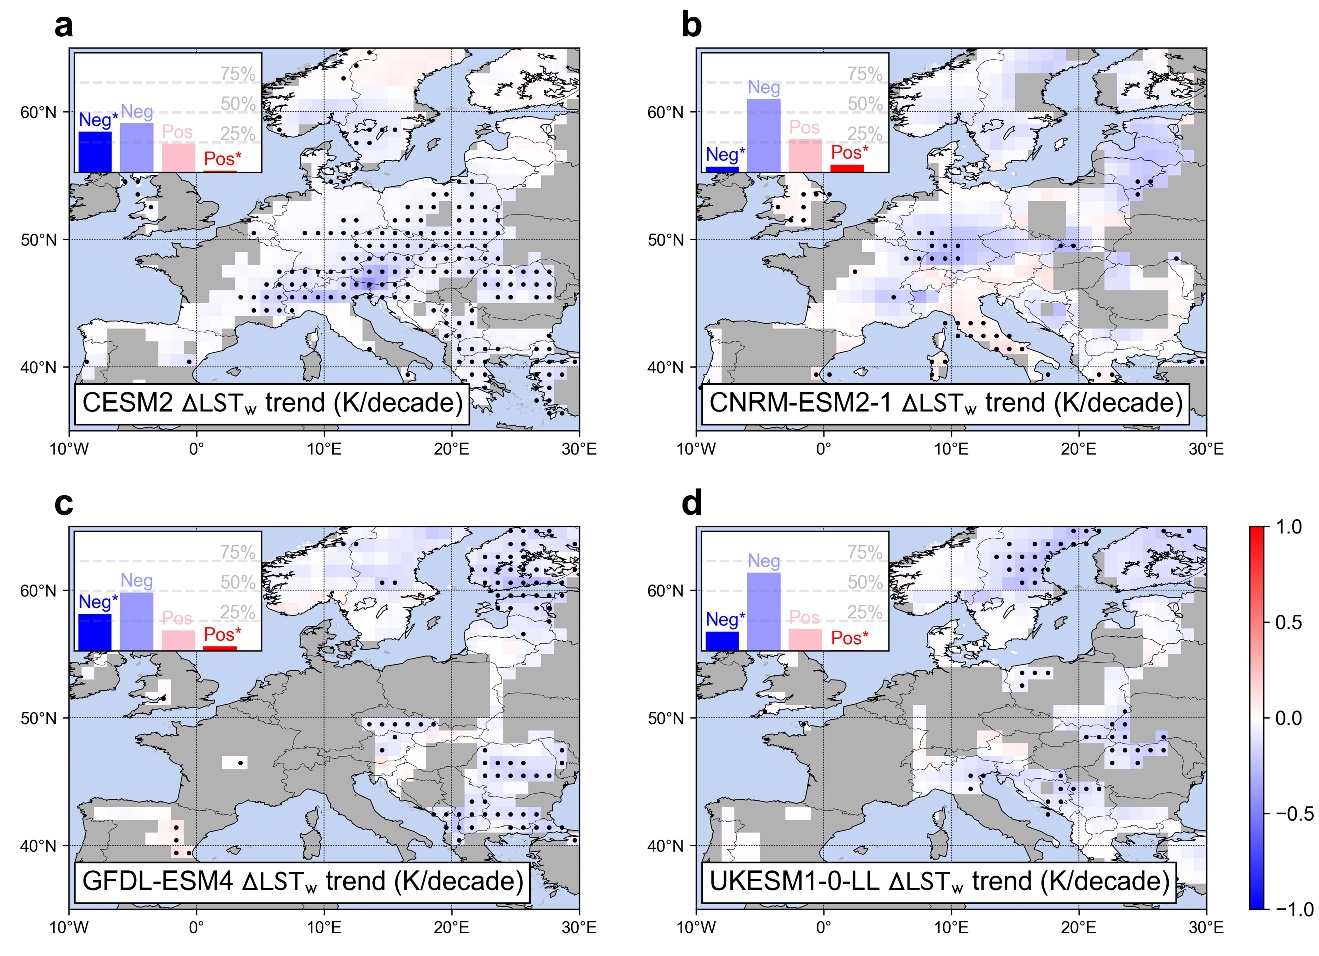


**Fig S11.** Simulated temporal dynamics in wintertime daily mean land surface temperatures effects of European forests (ΔLSTw) over 1985 to 2014 from (a) CESM2, (b) CNRM-ESM2-1, (c) GFDL-ESM4, and (d) UKESM1-0-LL. The dots indicate the grids with significant trends (p<0.05). The difference in valid grids is due to the distinctive effective forest tiles in four models.


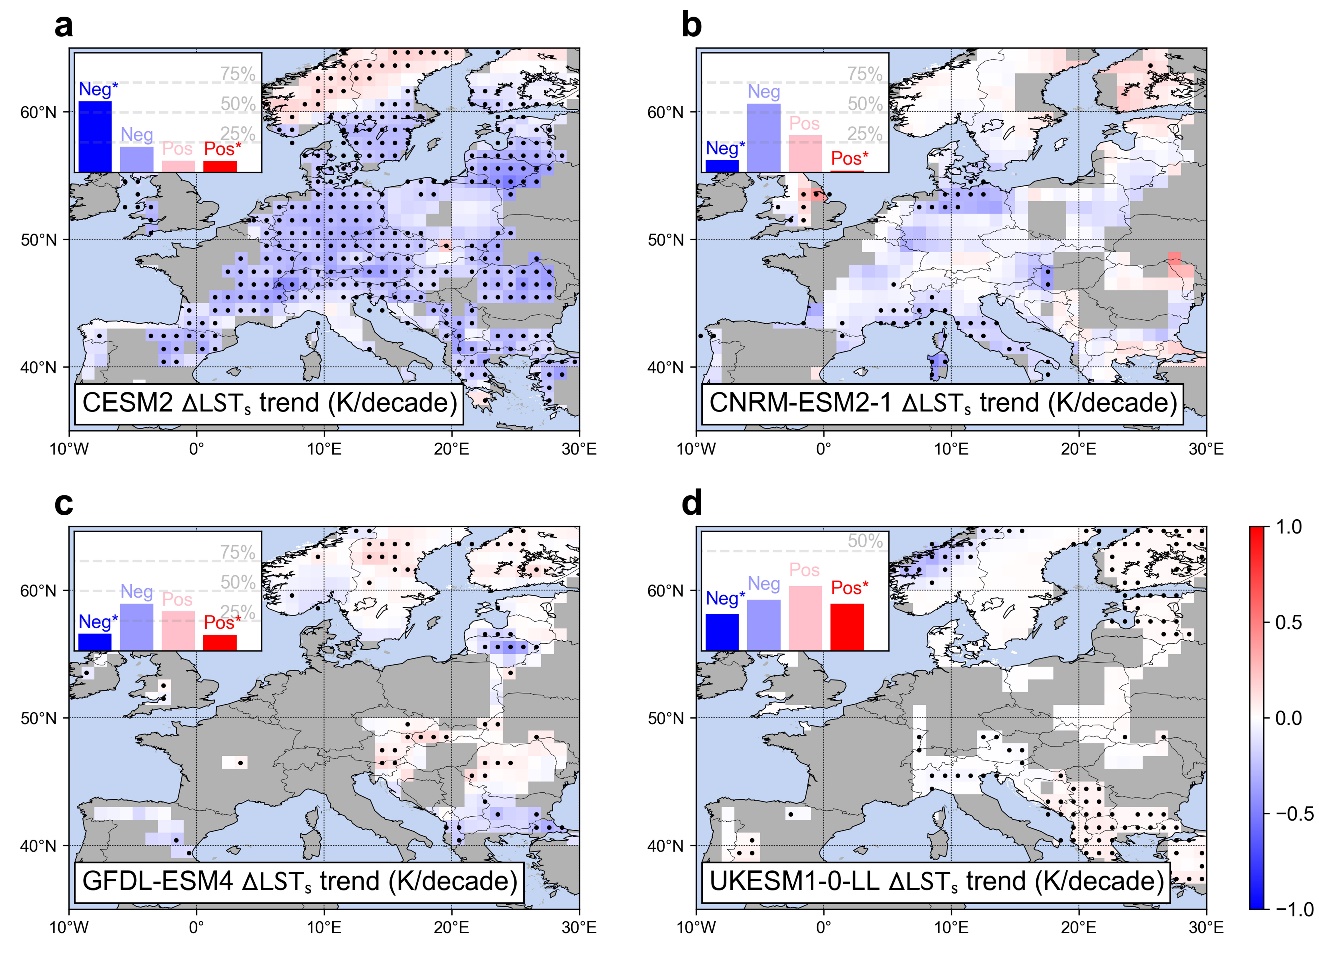


**Fig S12.** Simulated temporal dynamics in summertime daily mean land surface temperatures effects of European forests (ΔLSTs) over 1985 to 2014 from (a) CESM2, (b) CNRM-ESM2-1, (c) GFDL-ESM4, and (d) UKESM1-0-LL. The dots indicate the grids with significant trends (p<0.05). The difference in valid grids is due to the distinctive effective forest tiles in four models.


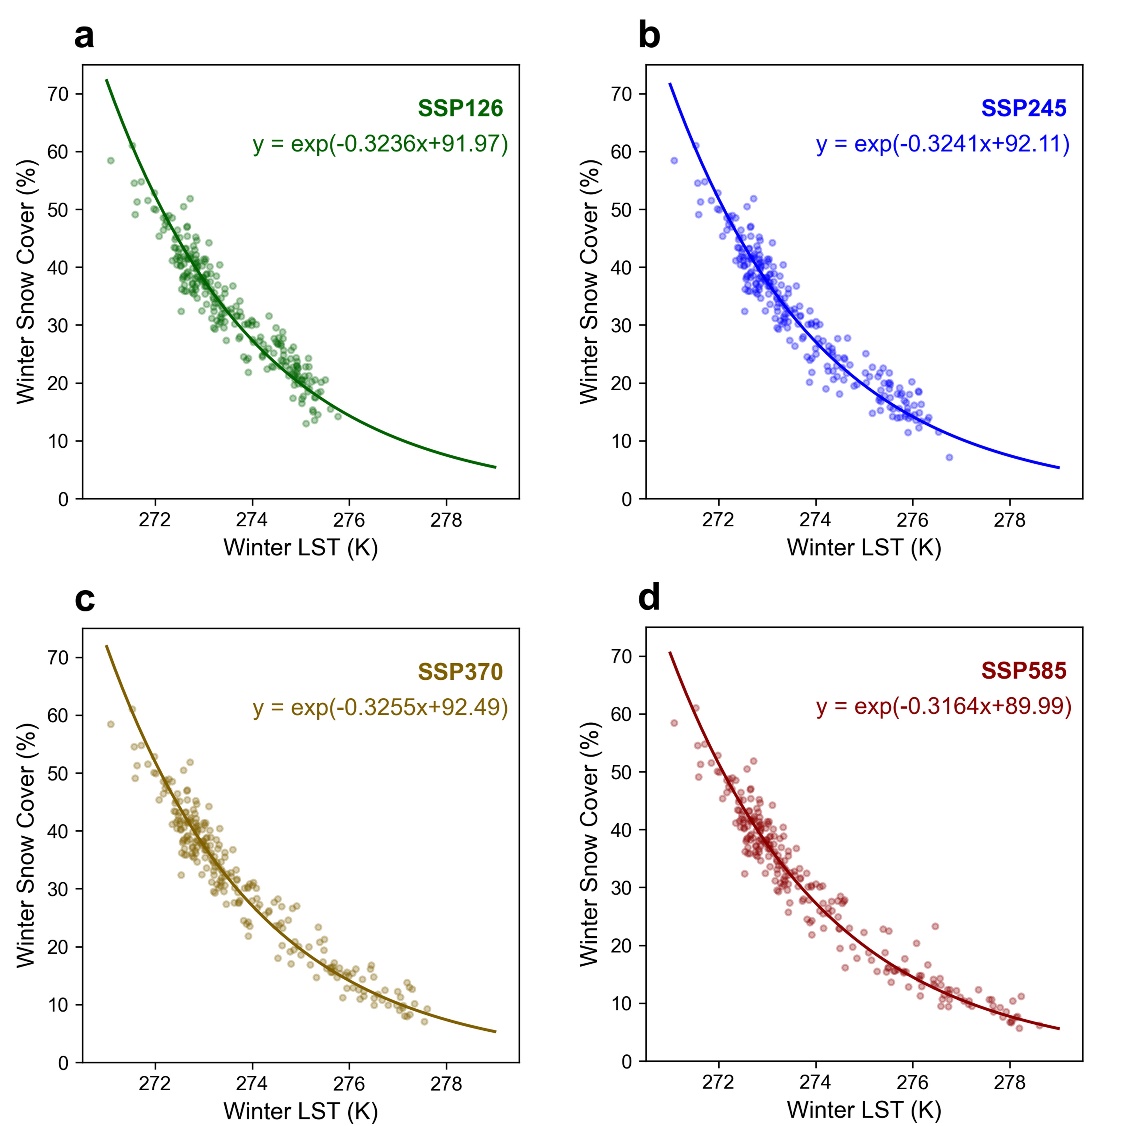


**Fig S13.** Relationship between wintertime land surface temperature (LST) and snow cover over (a) SSP126, (b) SSP245, (c) SSP370, and (d) SSP585.
